# Supplementary material for: Biomarker Data from the Phase III KATHERINE Study of Adjuvant T-DM1 versus Trastuzumab for Residual Invasive Disease after Neoadjuvant Therapy for HER2-Positive Breast Cancer
Source: PubMed Central journal article supplement — Clin Cancer Res. 2023 Feb 2;29(8):1569–81. doi: 10.1158/1078-0432.CCR-22-1989 (PMC10102844; doi:10.1158/1078-0432.ccr-22-1989), 2023-02-02

**Supplementary Figure S5.** Comparison of pre-NAT and post-NAT surgical RNA-evaluable samples. **(A)** ERBB2 (i.e., HER2), CD274 (i.e., PD-L1), checkpoint inhibitor signature (i.e., PD-L1/PD-L2/IDO), CD8A (i.e., CD8), TEFF signature CD8/granzymeA/granzymeB/perforin/IFN $\gamma$ ), three-gene signature (i.e., PD-L1/IFN $\gamma$ /CXCL9), five-gene signature (i.e., PD-L1/granzymeB/CD8/IFN $\gamma$ /CXCL9), Th1 cytokine signature (i.e., CXCL9/CXCL10/CXCL11), and B cell gene expression. **(B)** Frequency of AIMS PAM50 subtypes overall and by hormone receptor status. **(C)** Frequency of AIMS PAM50 subtypes by level of HER2 protein expression assessed by IHC in pre- and post-NAT samples. **(D)** Frequency of AIMS PAM50 subtypes by level of HER2 gene expression in pre- and post-NAT samples. **(E)** Hallmark gene sets enriched for genes upregulated in post-NAT surgical versus pre-NAT samples (adjusted  $P < 0.05$ ). **(F)** Hallmark gene sets enriched for genes downregulated in post-NAT surgical versus pre-NAT samples (adjusted  $P < 0.05$ ). Differential gene expression and pathway analyses were adjusted for tumor content. **(G)** Multidimensional scaling plot showing the differences in gene expression profiles between pre-NAT and post-NAT surgical samples. AIMS, Absolute Intrinsic Molecular Subtyping; ER, estrogen receptor; HER2, human epidermal growth factor receptor 2; HR, hormone receptor; IFN $\gamma$ , interferon gamma; IHC, immunohistochemistry; MDS, multidimensional scaling; Med, median; NAT, neoadjuvant therapy; NEG, negative; NES, normalized enrichment score; PAM50, Prediction Analysis of Microarray 50; POS, positive; PR, progesterone receptor.

A

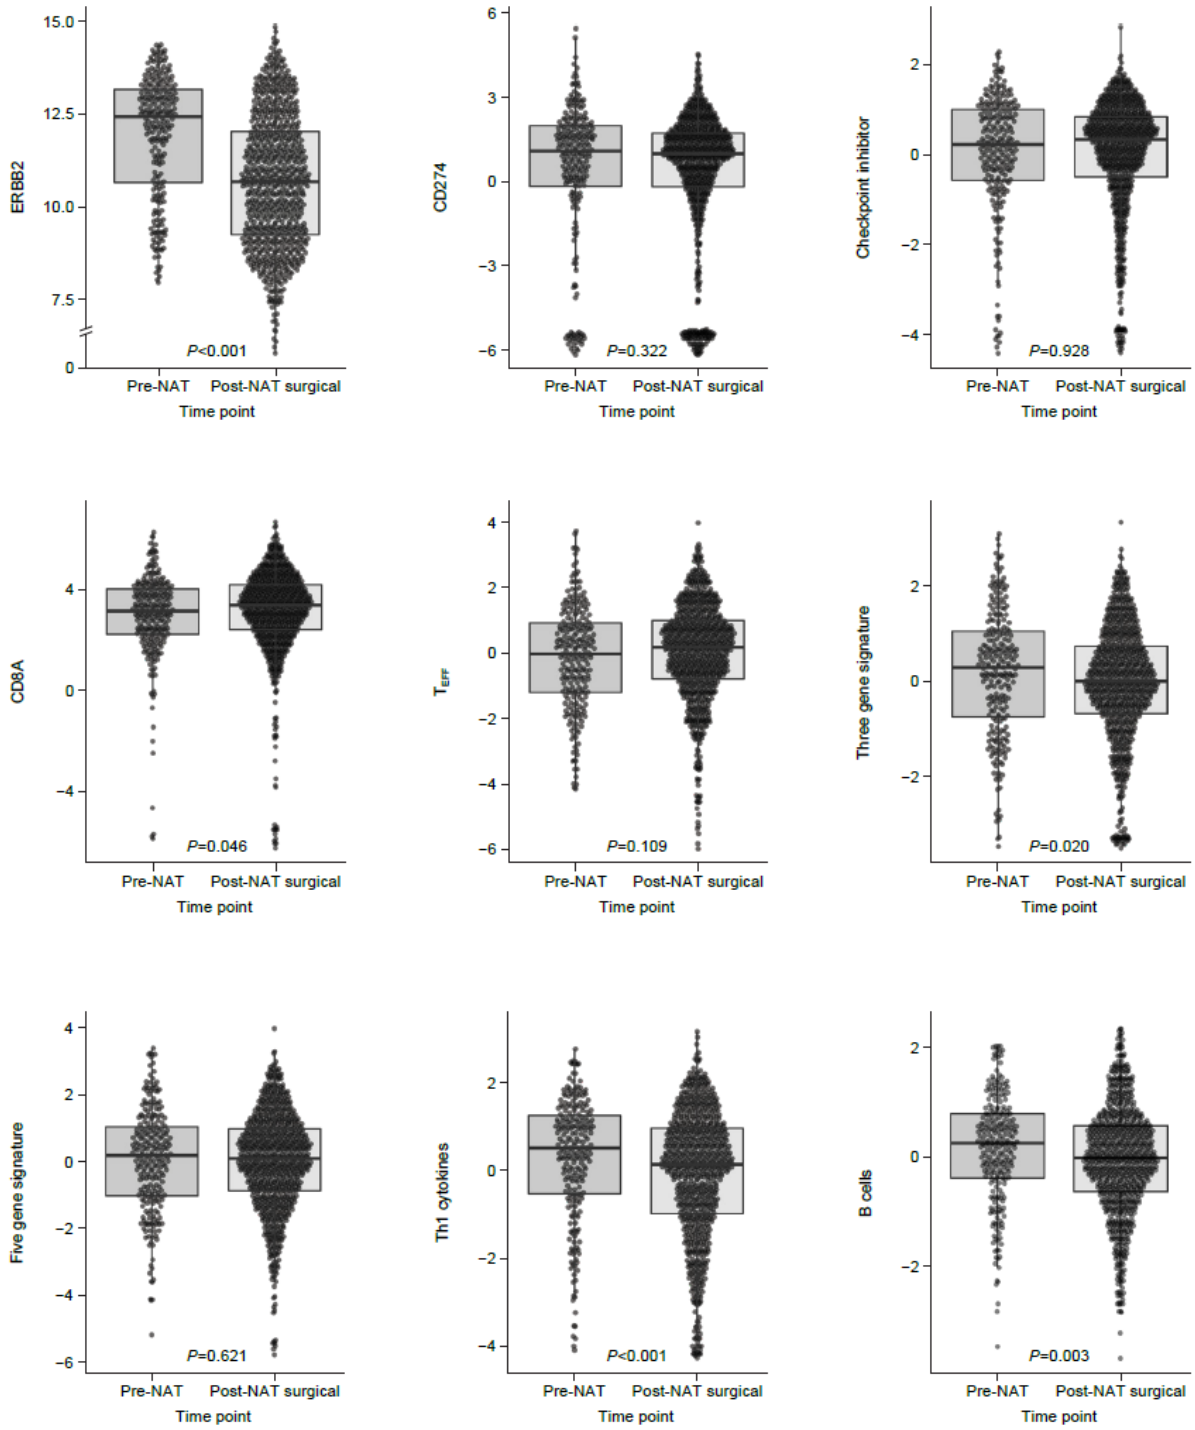

**B**

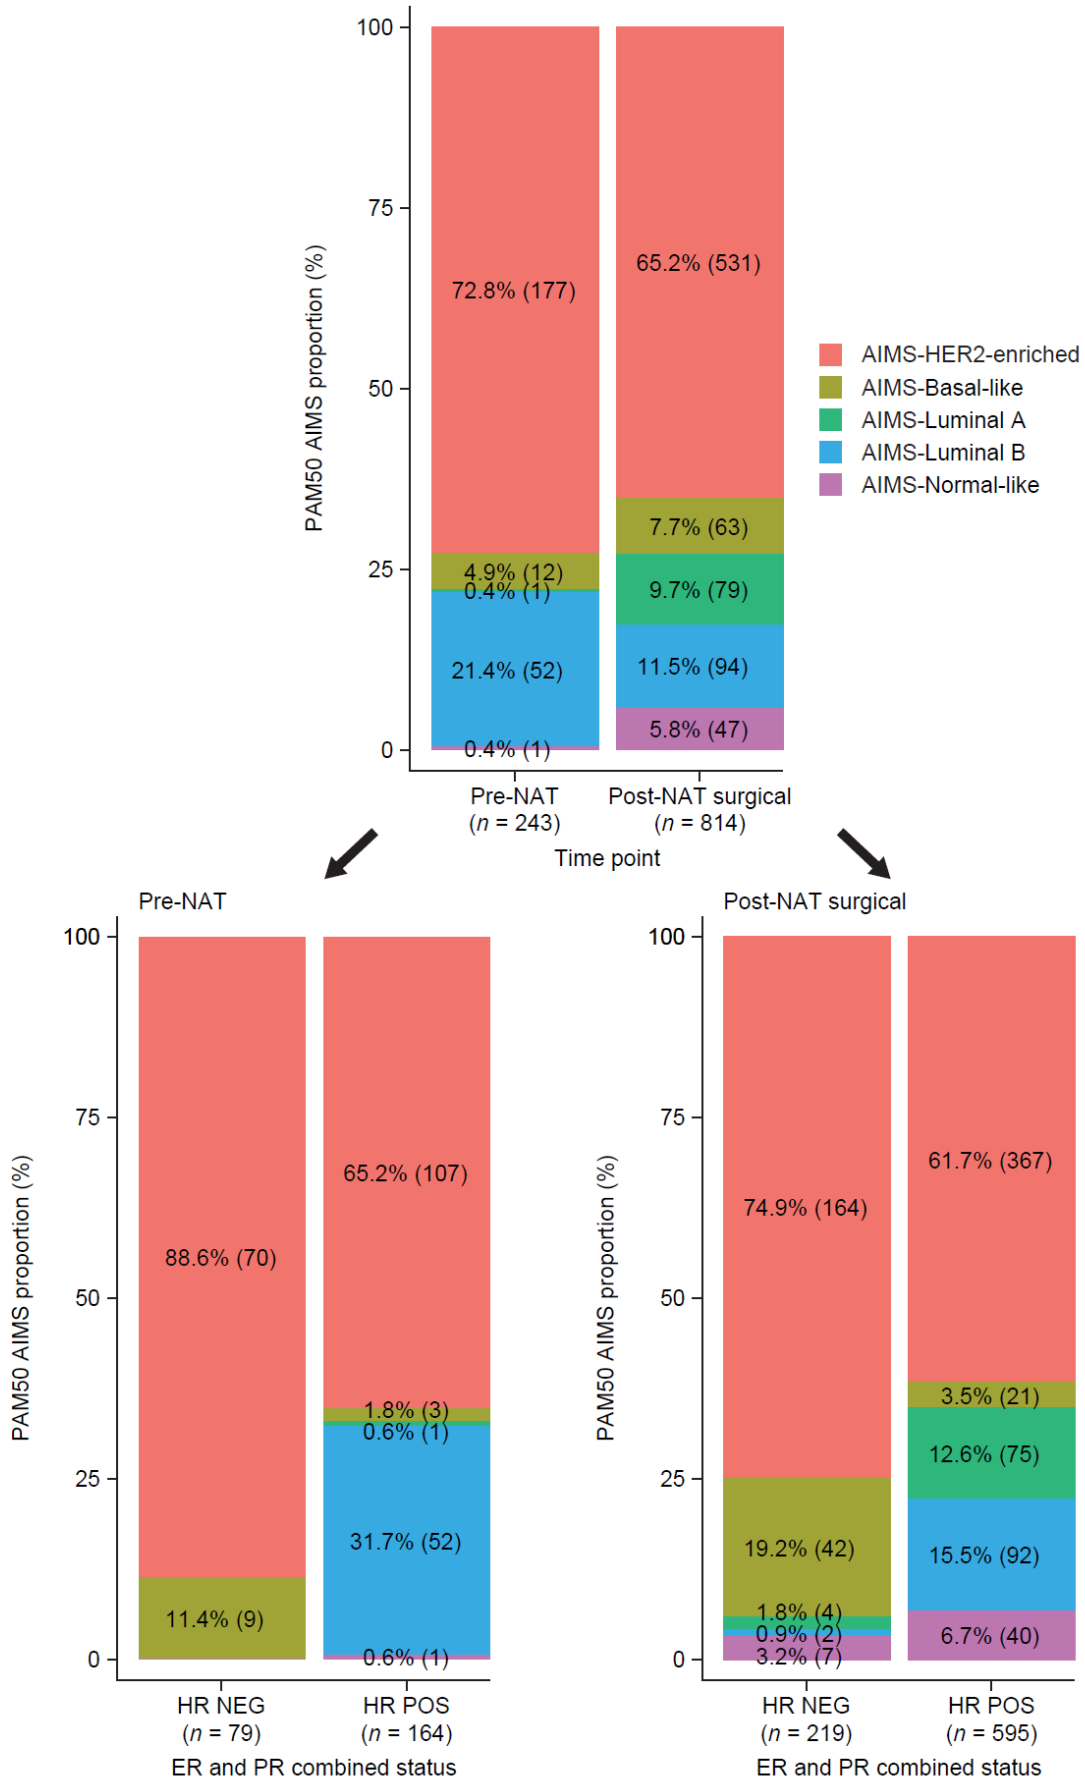

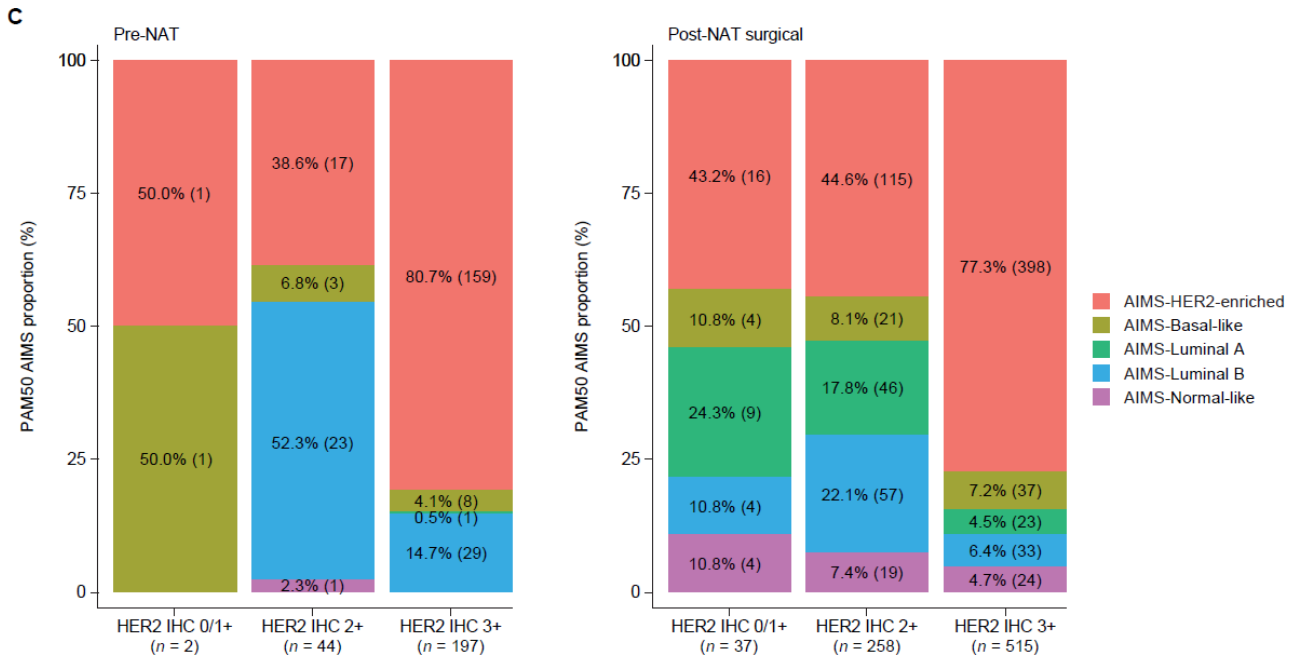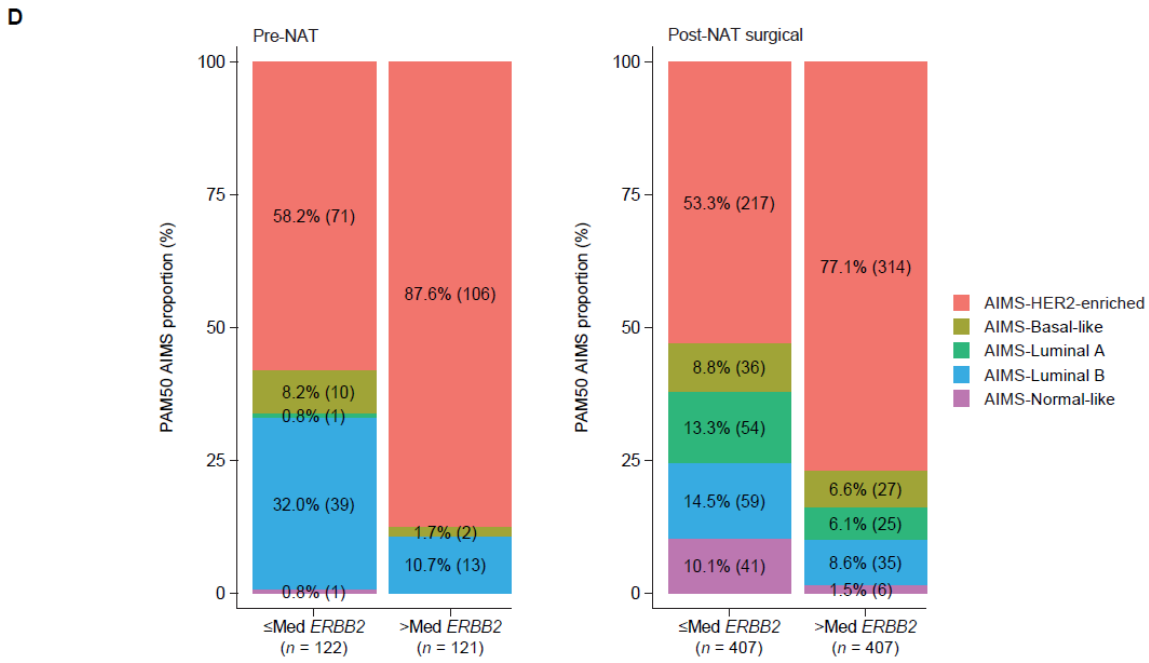

**E**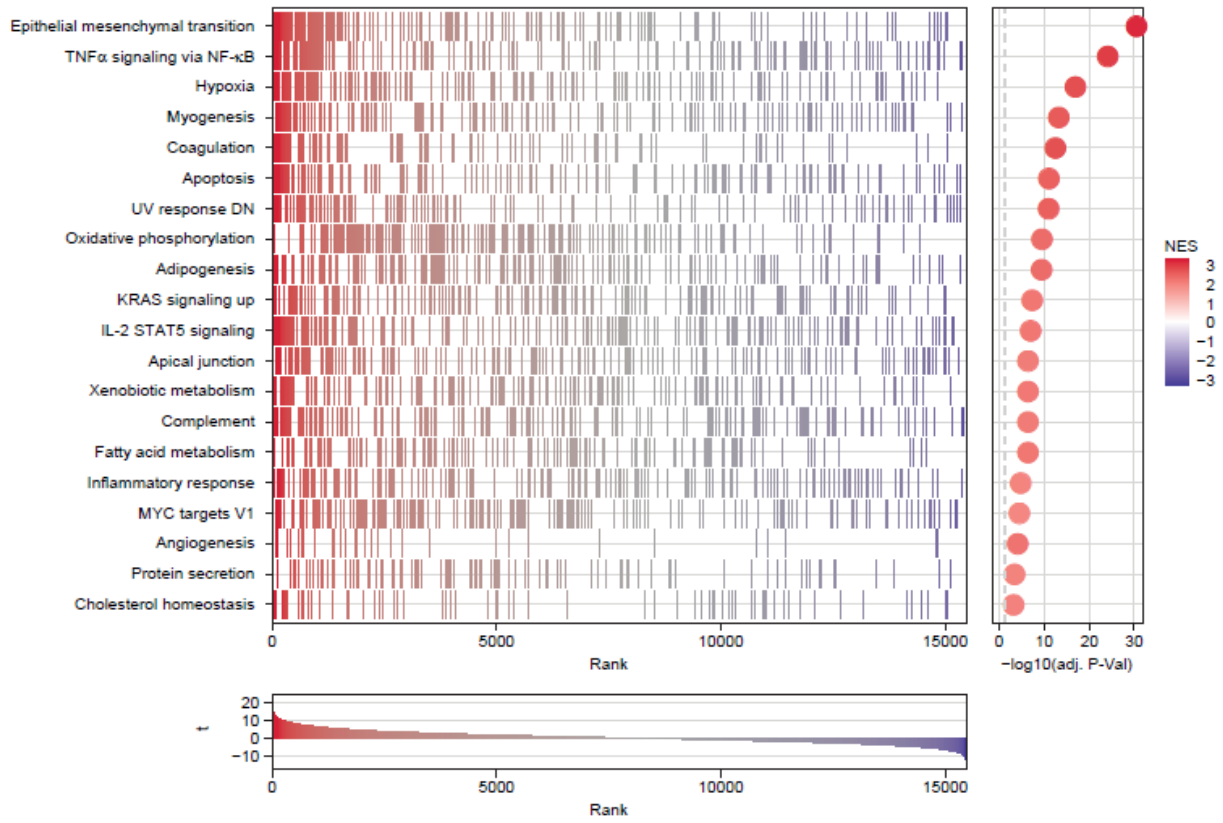**F**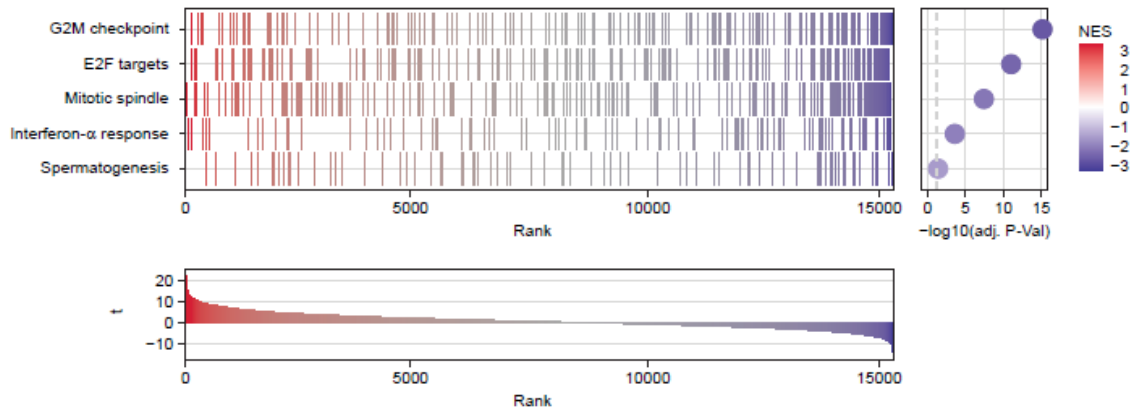

G

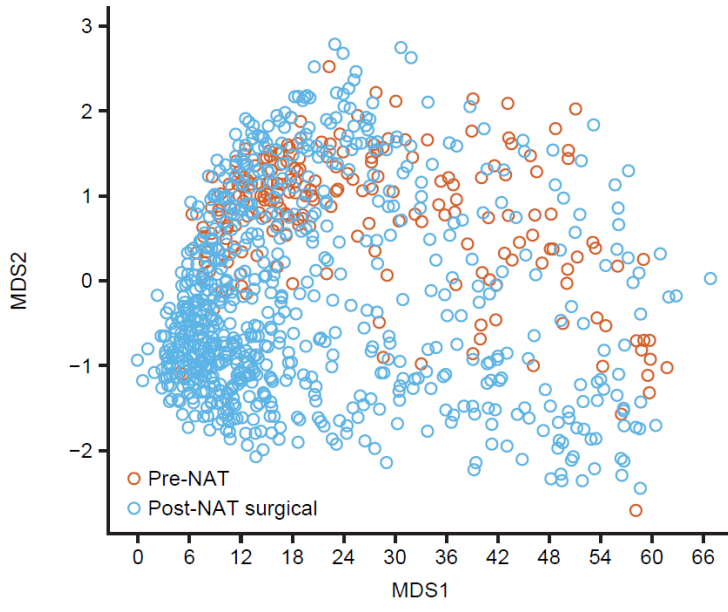

Supplement: ccr-22-1989_supplementary_figure_s5_suppfs5.pdf [file ccr-22-1989_supplementary_figure_s5_suppfs5.pdf]
