# Supplementary material for: Biomarker Data from the Phase III KATHERINE Study of Adjuvant T-DM1 versus Trastuzumab for Residual Invasive Disease after Neoadjuvant Therapy for HER2-Positive Breast Cancer
Source: PubMed Central journal article supplement — Clin Cancer Res. 2023 Feb 2;29(8):1569–81. doi: 10.1158/1078-0432.CCR-22-1989 (PMC10102844; doi:10.1158/1078-0432.ccr-22-1989), 2023-02-02

**Supplementary Figure S6.** HER2, PD-L1, and Five-Gene Signature Quartile Analysis. IDFS by HER2 gene expression quartile (**A**) in the trastuzumab arm; and (**B**) in the T-DM1 arm; (**C**) treatment effect on IDFS by HER2 gene expression quartile; (**D**) effect of HER2 gene expression quartile on IDFS; IDFS by PD-L1 gene expression quartile (**E**) in the trastuzumab arm; and (**F**) in the T-DM1 arm; (**G**) treatment effect on IDFS by PD-L1 gene expression quartile; (**H**) effect of PD-L1 gene expression quartile on IDFS; IDFS by five-gene signature (i.e., PD-L1/granzymeB/CD8/IFN $\gamma$ /CXCL9) gene expression quartile (**I**) in the trastuzumab arm; and (**J**) in the T-DM1 arm; (**K**) treatment effect on IDFS by five-gene signature gene expression quartile; (**L**) effect of five-gene signature gene expression quartile expression on IDFS. Each expression quartile (quartile 2, quartile 3, and quartile 4) is compared to the lowest quartile (quartile 1). The analyses are unstratified and adjusted using a Cox regression model that includes percent tumor in marked area, clinical stage at presentation, hormone receptor status, type of preoperative HER2-directed therapy, and pathologic nodal status. HER2, human epidermal growth factor receptor 2; IDFS, invasive disease-free survival; IFN $\gamma$ , interferon gamma; Q, quartile; T-DM1, trastuzumab emtansine.

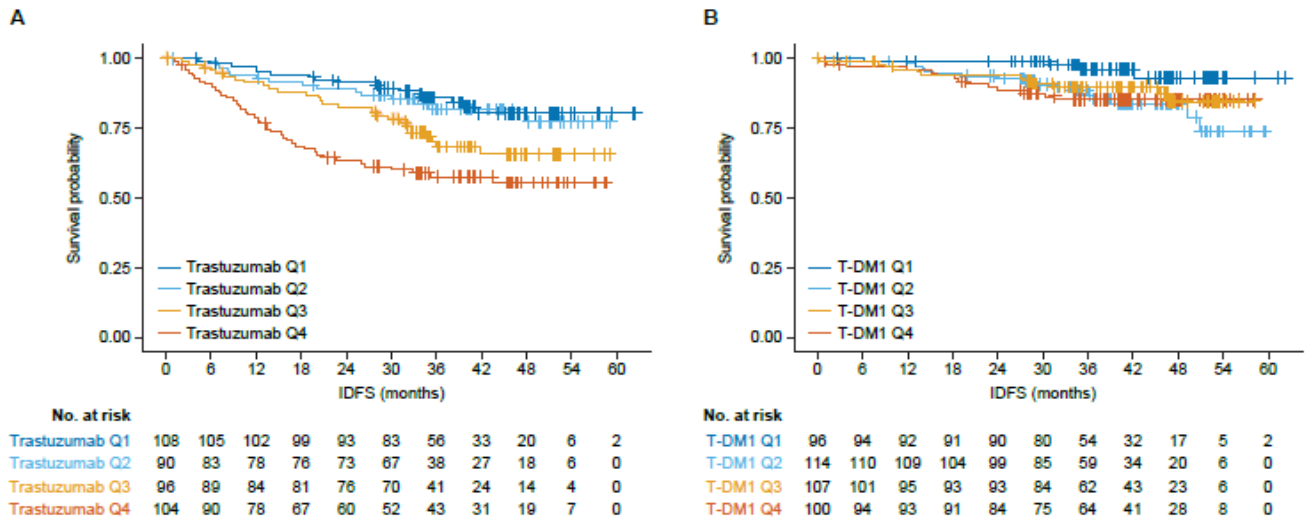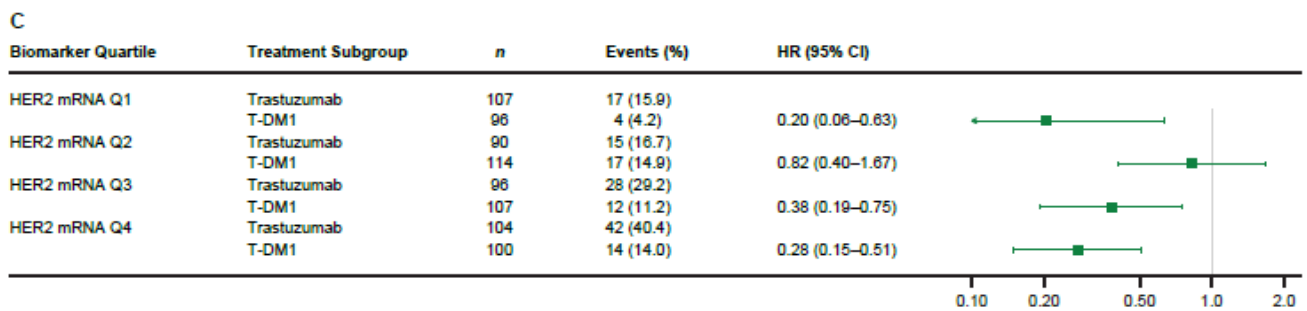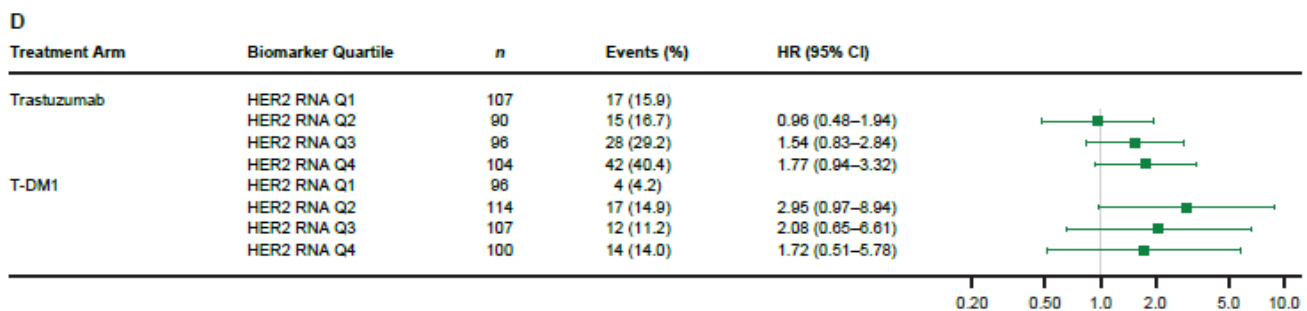

E

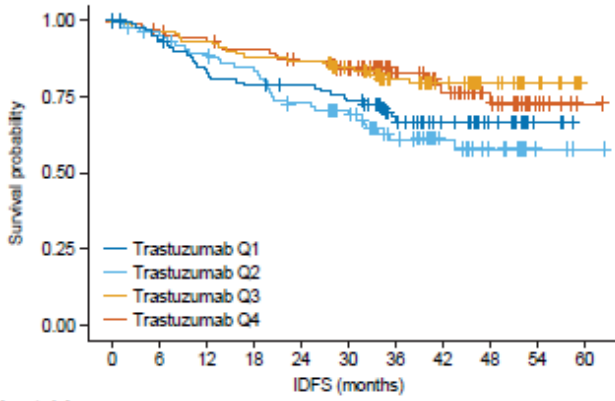

| No. at risk    |     | 0   | 6  | 12 | 18 | 24 | 30 | 36 | 42 | 48 | 54 | 60 |
|----------------|-----|-----|----|----|----|----|----|----|----|----|----|----|
| Trastuzumab Q1 | 105 | 94  | 82 | 78 | 75 | 70 | 44 | 27 | 17 | 4  | 0  |    |
| Trastuzumab Q2 | 90  | 82  | 76 | 71 | 60 | 51 | 35 | 19 | 12 | 3  | 1  |    |
| Trastuzumab Q3 | 95  | 89  | 86 | 81 | 80 | 72 | 50 | 36 | 22 | 9  | 0  |    |
| Trastuzumab Q4 | 108 | 102 | 98 | 93 | 87 | 79 | 49 | 33 | 20 | 7  | 1  |    |

F

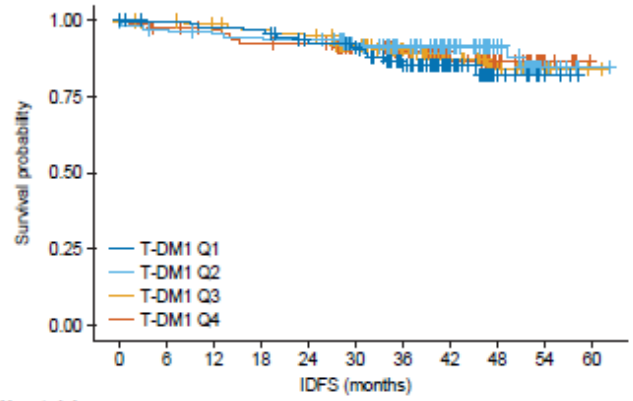

| No. at risk |     | 0   | 6   | 12  | 18  | 24 | 30 | 36 | 42 | 48 | 54 | 60 |
|-------------|-----|-----|-----|-----|-----|----|----|----|----|----|----|----|
| T-DM1 Q1    | 99  | 96  | 94  | 93  | 85  | 81 | 61 | 33 | 13 | 4  | 0  |    |
| T-DM1 Q2    | 114 | 108 | 105 | 104 | 102 | 86 | 68 | 50 | 30 | 9  | 1  |    |
| T-DM1 Q3    | 108 | 103 | 100 | 97  | 95  | 83 | 60 | 35 | 23 | 6  | 1  |    |
| T-DM1 Q4    | 96  | 92  | 90  | 85  | 84  | 74 | 50 | 32 | 22 | 6  | 0  |    |

G

| Biomarker Quartile | Treatment Subgroup | n   | Events (%) | HR (95% CI)      |
|--------------------|--------------------|-----|------------|------------------|
| PD-L1 RNA Q1       | Trastuzumab        | 105 | 31 (29.5)  | 0.41 (0.22–0.77) |
|                    | T-DM1              | 99  | 14 (14.1)  |                  |
| PD-L1 RNA Q2       | Trastuzumab        | 90  | 32 (35.6)  | 0.21 (0.10–0.41) |
|                    | T-DM1              | 114 | 11 (9.6)   |                  |
| PD-L1 RNA Q3       | Trastuzumab        | 95  | 18 (18.9)  | 0.57 (0.27–1.20) |
|                    | T-DM1              | 108 | 12 (11.1)  |                  |
| PD-L1 RNA Q4       | Trastuzumab        | 107 | 21 (19.6)  | 0.45 (0.21–0.96) |
|                    | T-DM1              | 96  | 10 (10.4)  |                  |

H

| Treatment Arm | Biomarker Quartile | n   | Events (%) | HR (95% CI)      |
|---------------|--------------------|-----|------------|------------------|
| Trastuzumab   | PD-L1 RNA Q1       | 105 | 31 (29.5)  | 1.26 (0.77–2.08) |
|               | PD-L1 RNA Q2       | 90  | 32 (35.6)  |                  |
|               | PD-L1 RNA Q3       | 95  | 18 (18.9)  |                  |
|               | PD-L1 RNA Q4       | 107 | 21 (19.6)  |                  |
| T-DM1         | PD-L1 RNA Q1       | 99  | 14 (14.1)  | 0.62 (0.28–1.37) |
|               | PD-L1 RNA Q2       | 114 | 11 (9.6)   |                  |
|               | PD-L1 RNA Q3       | 108 | 12 (11.1)  |                  |
|               | PD-L1 RNA Q4       | 96  | 10 (10.4)  |                  |

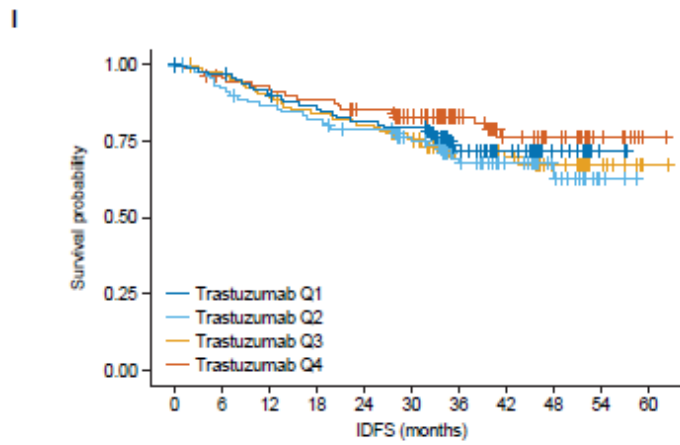

| No. at risk    |     |     |    |    |    |    |    |    |    |    |    |
|----------------|-----|-----|----|----|----|----|----|----|----|----|----|
|                | 0   | 6   | 12 | 18 | 24 | 30 | 36 | 42 | 48 | 54 | 60 |
| Trastuzumab Q1 | 103 | 96  | 88 | 84 | 79 | 77 | 48 | 27 | 16 | 3  | 0  |
| Trastuzumab Q2 | 97  | 84  | 78 | 74 | 68 | 60 | 40 | 29 | 13 | 3  | 0  |
| Trastuzumab Q3 | 107 | 101 | 93 | 86 | 82 | 72 | 46 | 31 | 20 | 9  | 1  |
| Trastuzumab Q4 | 91  | 86  | 83 | 79 | 73 | 63 | 44 | 28 | 22 | 8  | 1  |

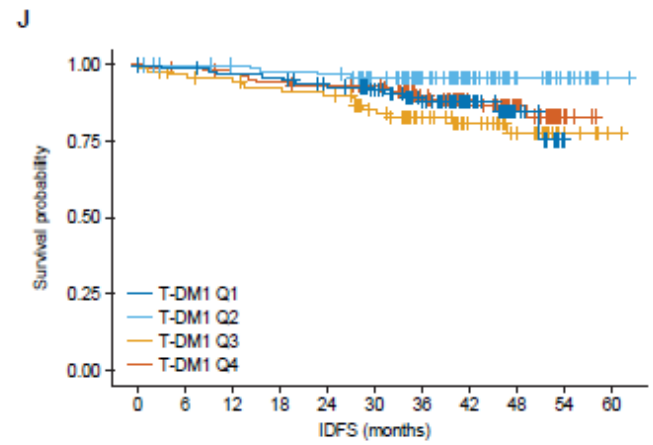

| No. at risk |     |     |     |     |    |    |    |    |    |    |    |
|-------------|-----|-----|-----|-----|----|----|----|----|----|----|----|
|             | 0   | 6   | 12  | 18  | 24 | 30 | 36 | 42 | 48 | 54 | 60 |
| T-DM1 Q1    | 101 | 99  | 96  | 95  | 87 | 79 | 62 | 35 | 13 | 1  | 0  |
| T-DM1 Q2    | 107 | 103 | 101 | 99  | 98 | 87 | 64 | 41 | 25 | 13 | 1  |
| T-DM1 Q3    | 96  | 90  | 88  | 84  | 82 | 67 | 48 | 31 | 22 | 6  | 1  |
| T-DM1 Q4    | 113 | 107 | 104 | 101 | 99 | 91 | 65 | 43 | 28 | 5  | 0  |

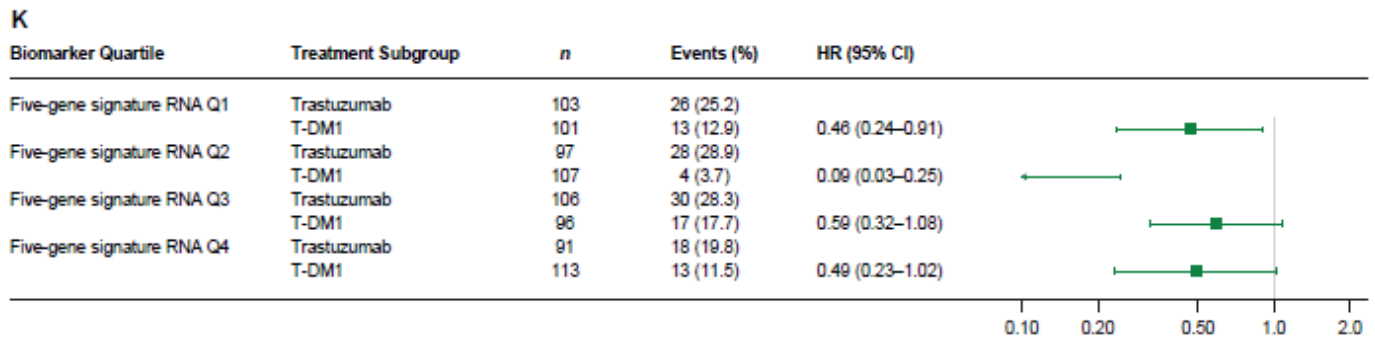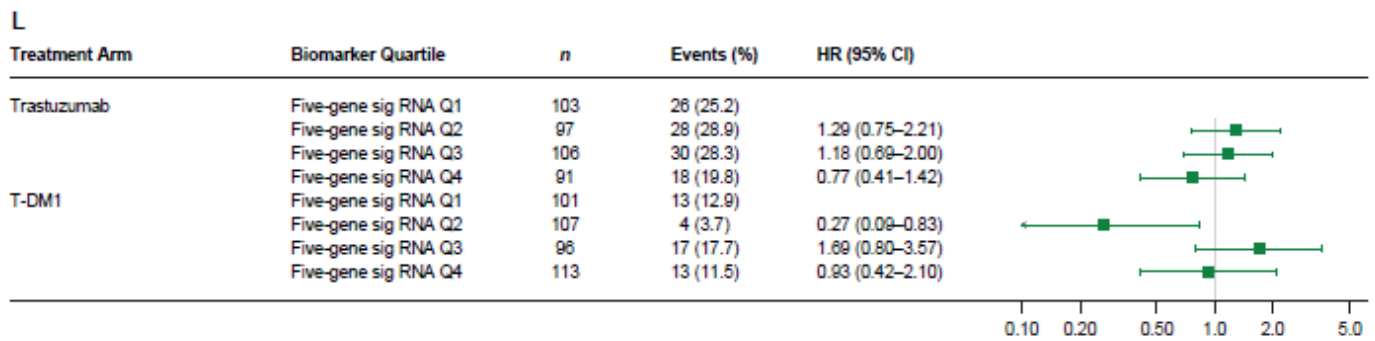

Supplement: ccr-22-1989_supplementary_figure_s6_suppfs6.pdf [file ccr-22-1989_supplementary_figure_s6_suppfs6.pdf]
