# Supplementary material for: Biomarker Data from the Phase III KATHERINE Study of Adjuvant T-DM1 versus Trastuzumab for Residual Invasive Disease after Neoadjuvant Therapy for HER2-Positive Breast Cancer
Source: PubMed Central journal article supplement — Clin Cancer Res. 2023 Feb 2;29(8):1569–81. doi: 10.1158/1078-0432.CCR-22-1989 (PMC10102844; doi:10.1158/1078-0432.ccr-22-1989), 2023-02-02
Supplement: ccr-22-1989_supplementary_figure_s1_suppfs1.pdf [file ccr-22-1989_supplementary_figure_s1_suppfs1.pdf]

**Supplementary Figure S1.** Comparison of HER2 expression intensity in paired pre-NAT (i.e., before surgery) and post-NAT surgical samples. HER2, human epidermal growth factor receptor 2; IHC, immunohistochemistry; NAT, neoadjuvant therapy.

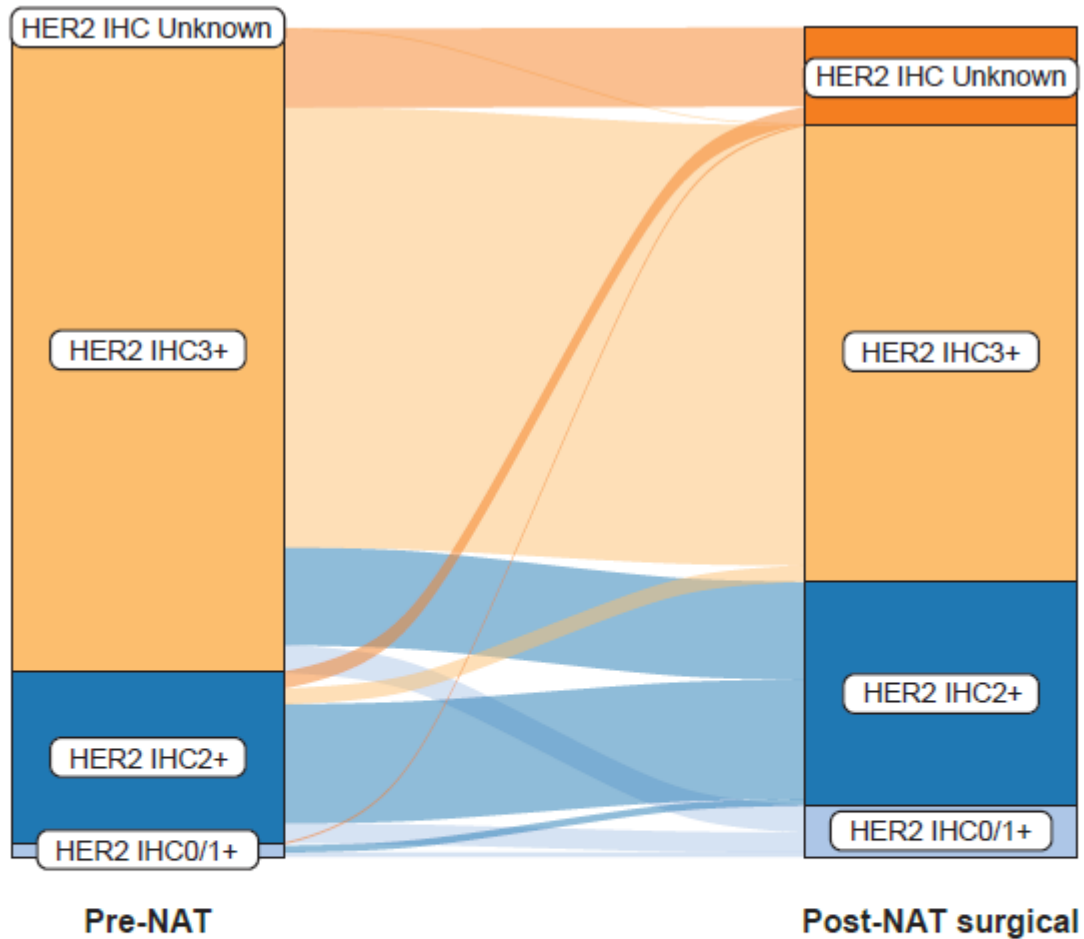

| HER2 staining intensity, <i>n</i> (%) | Pre-NAT<br>( <i>n</i> = 1002) | Post-NAT surgical<br>( <i>n</i> = 1002) |
|---------------------------------------|-------------------------------|-----------------------------------------|
| IHC3+                                 | 778 (77.6)                    | 553 (55.2)                              |
| IHC2+                                 | 207 (20.7)                    | 270 (26.9)                              |
| IHC0/1+                               | 16 (1.6)                      | 62 (6.2)                                |
| Unknown                               | 1 (0.1)                       | 117 (11.7)                              |
