# Supplementary material for: Biomarker Data from the Phase III KATHERINE Study of Adjuvant T-DM1 versus Trastuzumab for Residual Invasive Disease after Neoadjuvant Therapy for HER2-Positive Breast Cancer
Source: PubMed Central journal article supplement — Clin Cancer Res. 2023 Feb 2;29(8):1569–81. doi: 10.1158/1078-0432.CCR-22-1989 (PMC10102844; doi:10.1158/1078-0432.ccr-22-1989), 2023-02-02
Supplement: ccr-22-1989_supplementary_figure_s2_suppfs2.pdf [file ccr-22-1989_supplementary_figure_s2_suppfs2.pdf]

**Supplementary Figure S2.** Comparison of HER2 expression heterogeneity in paired pre-NAT (i.e., before surgery) and post-NAT surgical samples. Patients were categorized according to whether HER2 staining was focal (<30%), heterogeneous (30–79%), or homogeneous (≥80%) based on the total percentage of cells stained with 2+ and 3+ intensity. IHC, immunohistochemistry; NAT, neoadjuvant therapy.

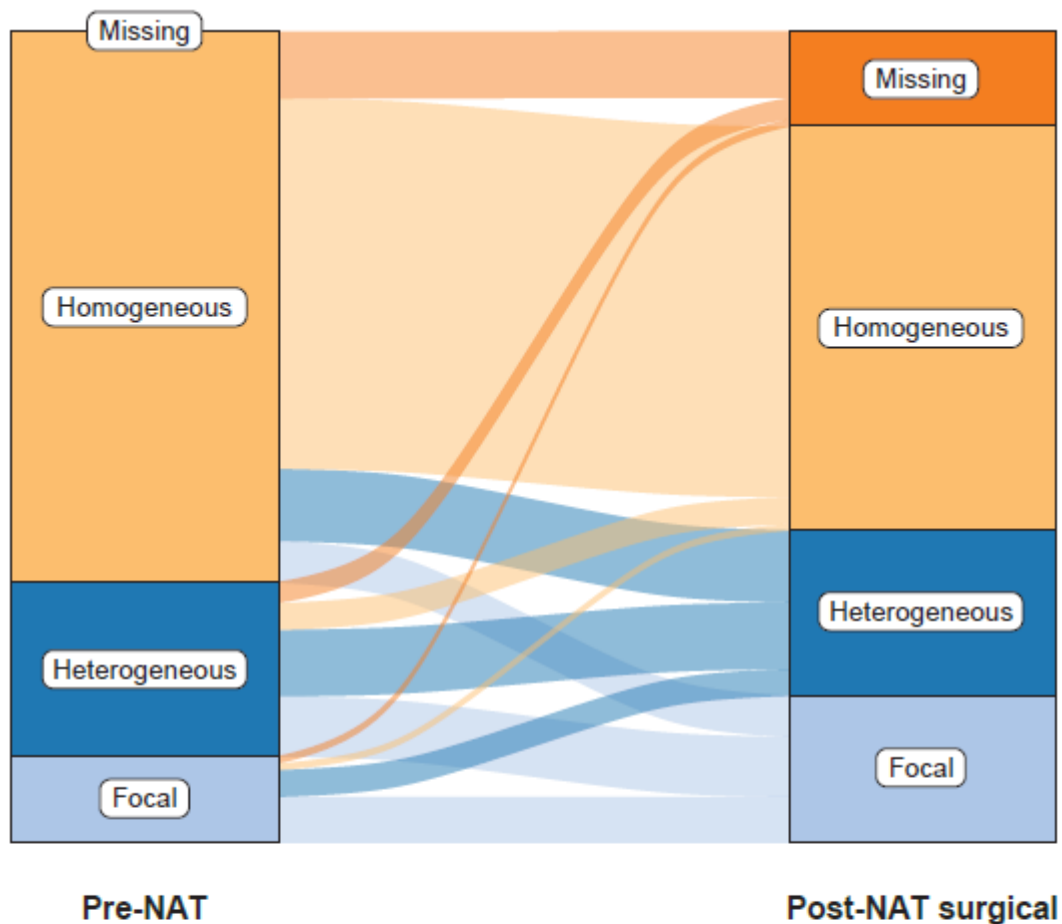

| Subgroup of IHC2+/3+, n (%) | Pre-NAT<br>(n = 1002) | Post-NAT surgical<br>(n = 1002) |
|-----------------------------|-----------------------|---------------------------------|
| Focal                       | 107 (10.7)            | 182 (18.2)                      |
| Heterogeneous               | 215 (21.5)            | 204 (20.4)                      |
| Homogeneous                 | 679 (67.8)            | 499 (49.8)                      |
| Missing                     | 1 (0.1)               | 117 (11.7)                      |
