# Supplementary material for: Biomarker Data from the Phase III KATHERINE Study of Adjuvant T-DM1 versus Trastuzumab for Residual Invasive Disease after Neoadjuvant Therapy for HER2-Positive Breast Cancer
Source: PubMed Central journal article supplement — Clin Cancer Res. 2023 Feb 2;29(8):1569–81. doi: 10.1158/1078-0432.CCR-22-1989 (PMC10102844; doi:10.1158/1078-0432.ccr-22-1989), 2023-02-02

**Supplementary Figure S3.** IDFS by HER2 IHC score at definitive surgery (derived from samples used for eligibility and exploratory purposes). IDFS, invasive disease-free survival; IHC, immunohistochemistry; T-DM1, trastuzumab emtansine.

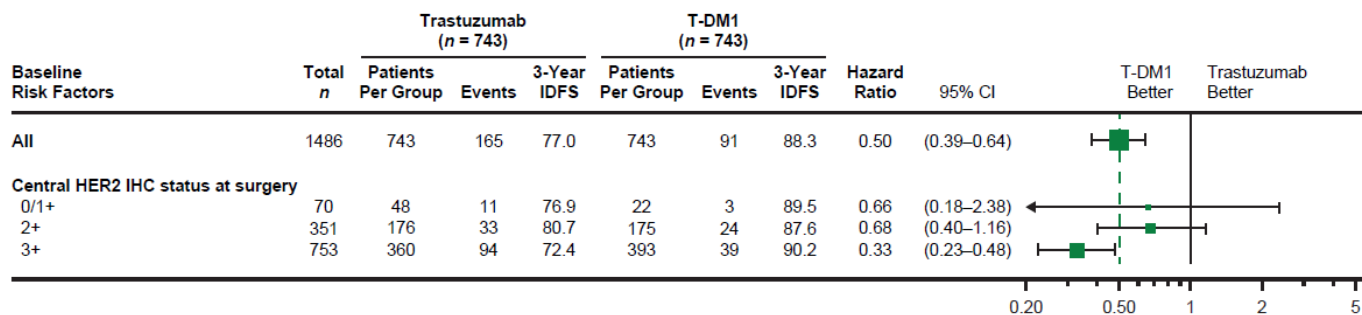

Supplement: ccr-22-1989_supplementary_figure_s3_suppfs3.pdf [file ccr-22-1989_supplementary_figure_s3_suppfs3.pdf]
