# Supplementary material for: Biomarker Data from the Phase III KATHERINE Study of Adjuvant T-DM1 versus Trastuzumab for Residual Invasive Disease after Neoadjuvant Therapy for HER2-Positive Breast Cancer
Source: PubMed Central journal article supplement — Clin Cancer Res. 2023 Feb 2;29(8):1569–81. doi: 10.1158/1078-0432.CCR-22-1989 (PMC10102844; doi:10.1158/1078-0432.ccr-22-1989), 2023-02-02
Supplement: ccr-22-1989_supplementary_figure_s4_suppfs4.pdf [file ccr-22-1989_supplementary_figure_s4_suppfs4.pdf]

**Supplementary Figure S4.** Comparison of IDFS outcomes in the ITT population compared to the (A) RNA-evaluable population (REP) (including pre- and post-NAT surgical samples) and in patients with (B) pre-NAT REP samples (left) or post-NAT surgical REP samples (right). HER2, human epidermal growth factor receptor 2; IDFS, invasive disease-free survival; IHC, immunohistochemistry; ITT, intent-to-treat; NAT, neoadjuvant therapy; T-DM1, trastuzumab emtansine.

**A**

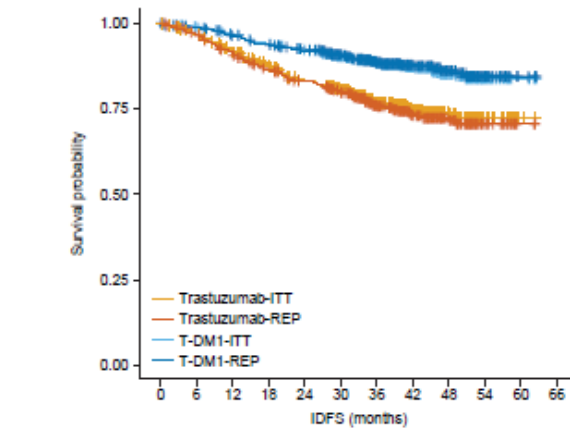

| No. at risk     | 0   | 6   | 12  | 18  | 24  | 30  | 36  | 42  | 48  | 54 | 60 | 66 |
|-----------------|-----|-----|-----|-----|-----|-----|-----|-----|-----|----|----|----|
| Trastuzumab-ITT | 743 | 676 | 635 | 594 | 555 | 501 | 342 | 220 | 119 | 38 | 4  | 0  |
| Trastuzumab-REP | 520 | 483 | 451 | 422 | 396 | 357 | 241 | 158 | 90  | 26 | 2  | 0  |
| T-DM1-ITT       | 743 | 707 | 681 | 658 | 633 | 561 | 409 | 255 | 142 | 44 | 4  | 0  |
| T-DM1-REP       | 539 | 519 | 500 | 484 | 466 | 411 | 304 | 192 | 111 | 32 | 3  | 0  |

| Group | Total n | HR   | 95% CI    | P-value |
|-------|---------|------|-----------|---------|
| ITT   | 1486    | 0.50 | 0.39–0.64 | <0.0001 |
| REP   | 1059    | 0.45 | 0.33–0.61 | <0.0001 |

**B**

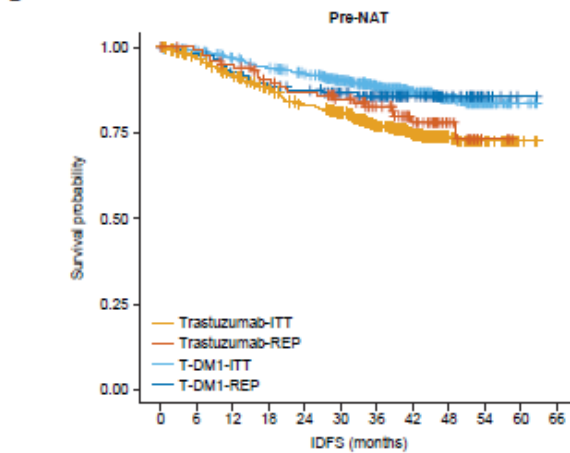

| No. at risk     | 0   | 6   | 12  | 18  | 24  | 30  | 36  | 42  | 48  | 54 | 60 | 66 |
|-----------------|-----|-----|-----|-----|-----|-----|-----|-----|-----|----|----|----|
| Trastuzumab-ITT | 743 | 676 | 635 | 594 | 555 | 501 | 342 | 220 | 119 | 38 | 4  | 0  |
| Trastuzumab-REP | 122 | 116 | 109 | 99  | 94  | 85  | 63  | 43  | 19  | 3  | 0  | 0  |
| T-DM1-ITT       | 743 | 707 | 681 | 658 | 633 | 561 | 409 | 255 | 142 | 44 | 4  | 0  |
| T-DM1-REP       | 122 | 120 | 111 | 105 | 100 | 87  | 65  | 42  | 23  | 7  | 1  | 0  |

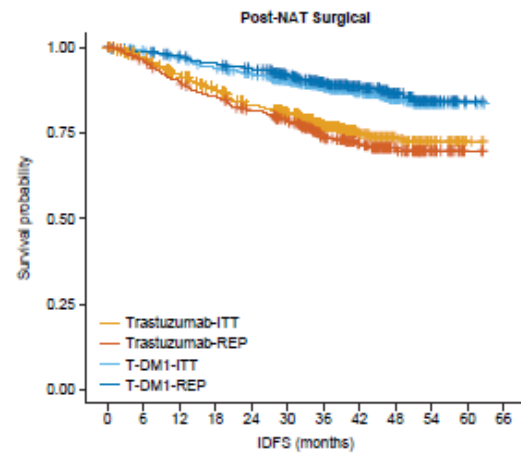

| No. at risk     | 0   | 6   | 12  | 18  | 24  | 30  | 36  | 42  | 48  | 54 | 60 | 66 |
|-----------------|-----|-----|-----|-----|-----|-----|-----|-----|-----|----|----|----|
| Trastuzumab-ITT | 743 | 676 | 635 | 594 | 555 | 501 | 342 | 220 | 119 | 38 | 4  | 0  |
| Trastuzumab-REP | 398 | 367 | 342 | 323 | 302 | 272 | 178 | 115 | 71  | 23 | 2  | 0  |
| T-DM1-ITT       | 743 | 707 | 681 | 658 | 633 | 561 | 409 | 255 | 142 | 44 | 4  | 0  |
| T-DM1-REP       | 417 | 399 | 389 | 379 | 366 | 324 | 239 | 150 | 88  | 25 | 2  | 0  |

| Group                 | Total n | HR   | 95% CI    | P-value |
|-----------------------|---------|------|-----------|---------|
| ITT                   | 1486    | 0.50 | 0.39–0.64 | <0.0001 |
| Pre-NAT REP           | 244     | 0.71 | 0.38–1.33 | 0.2849  |
| Post-NAT Surgical REP | 815     | 0.39 | 0.28–0.55 | <0.0001 |
