# Supplementary material for: Biomarker Data from the Phase III KATHERINE Study of Adjuvant T-DM1 versus Trastuzumab for Residual Invasive Disease after Neoadjuvant Therapy for HER2-Positive Breast Cancer
Source: PubMed Central journal article supplement — Clin Cancer Res. 2023 Feb 2;29(8):1569–81. doi: 10.1158/1078-0432.CCR-22-1989 (PMC10102844; doi:10.1158/1078-0432.ccr-22-1989), 2023-02-02
Supplement: ccr-22-1989_supplementary_table_s1_suppts1.pdf [file ccr-22-1989_supplementary_table_s1_suppts1.pdf]

**Supplementary Table S1.** Comparison of baseline patient and disease characteristics assessed at eligibility in the ITT population versus in those with mRNA data derived from pre-NAT or post-NAT surgical samples (RNA-evaluable population). Note: the pre-NAT and post-NAT samples are not paired.

| Characteristic                                                    | ITT Population               |                                  |                            | Patients with Pre-NAT RNA Data |                                  |                            | Patients with Surgical Post-NAT RNA Data |                                  |                            |
|-------------------------------------------------------------------|------------------------------|----------------------------------|----------------------------|--------------------------------|----------------------------------|----------------------------|------------------------------------------|----------------------------------|----------------------------|
|                                                                   | Pooled<br>( <i>N</i> = 1486) | Trastuzumab<br>( <i>n</i> = 743) | T-DM1<br>( <i>n</i> = 743) | Pooled<br>( <i>n</i> = 244)    | Trastuzumab<br>( <i>n</i> = 122) | T-DM1<br>( <i>n</i> = 122) | Pooled<br>( <i>n</i> = 815)              | Trastuzumab<br>( <i>n</i> = 398) | T-DM1<br>( <i>n</i> = 417) |
| Age, years                                                        |                              |                                  |                            |                                |                                  |                            |                                          |                                  |                            |
| Median (range)                                                    | 49 (23–80)                   | 49 (23–80)                       | 49 (24–79)                 | 47 (23–77)                     | 47 (23–77)                       | 48 (25–72)                 | 49 (23–80)                               | 49 (23–80)                       | 50 (24–77)                 |
| Race, <i>n</i> (%)                                                |                              |                                  |                            |                                |                                  |                            |                                          |                                  |                            |
| White                                                             | 1082 (72.8)                  | 531 (71.5)                       | 551 (74.2)                 | 174 (71.3)                     | 92 (75.4)                        | 82 (67.2)                  | 587 (72.0)                               | 275 (69.1)                       | 312 (74.8)                 |
| Asian                                                             | 129 (8.7)                    | 64 (8.6)                         | 65 (8.7)                   | 11 (4.5)                       | 4 (3.3)                          | 7 (5.7)                    | 74 (9.1)                                 | 38 (9.6)                         | 36 (8.6)                   |
| Black or African American                                         | 40 (2.7)                     | 19 (2.6)                         | 21 (2.8)                   | 8 (3.3)                        | 2 (1.6)                          | 6 (4.9)                    | 23 (2.8)                                 | 11 (2.8)                         | 12 (2.9)                   |
| American Indian <sup>a</sup> , Alaska Native, or Pacific Islander | 87 (5.9)                     | 51 (6.9)                         | 36 (4.8)                   | 24 (9.8)                       | 13 (10.7)                        | 11 (9.0)                   | 43 (5.3)                                 | 29 (7.3)                         | 14 (3.4)                   |
| Multiple/unknown                                                  | 148 (10.0)                   | 78 (10.5)                        | 70 (9.4)                   | 27 (11.1)                      | 11 (9.0)                         | 16 (13.1)                  | 88 (10.8)                                | 45 (11.3)                        | 43 (10.3)                  |
| Clinical stage at presentation, <i>n</i> (%)                      |                              |                                  |                            |                                |                                  |                            |                                          |                                  |                            |
| Inoperable                                                        | 375 (25.2)                   | 190 (25.6)                       | 185 (24.9)                 | 63 (25.8)                      | 30 (24.6)                        | 33 (27.1)                  | 185 (22.7)                               | 94 (23.6)                        | 91 (21.8)                  |
| Operable                                                          | 1111 (74.8)                  | 553 (74.4)                       | 558 (75.1)                 | 181 (74.2)                     | 92 (75.4)                        | 89 (73.0)                  | 630 (77.3)                               | 304 (76.4)                       | 326 (78.2)                 |
| Hormone receptor status, <i>n</i> (%)                             |                              |                                  |                            |                                |                                  |                            |                                          |                                  |                            |
| ER negative and PgR negative/unknown                              | 412 (27.7)                   | 203 (27.3)                       | 209 (28.1)                 | 79 (32.4)                      | 37 (30.3)                        | 42 (34.4)                  | 219 (26.9)                               | 110 (27.6)                       | 109 (26.1)                 |

|                                                 |                 |                |                |                |                |                |                |                |                |
|-------------------------------------------------|-----------------|----------------|----------------|----------------|----------------|----------------|----------------|----------------|----------------|
| ER and/or PgR positive                          | 1074 (72.3)     | 540 (72.7)     | 534 (71.9)     | 165 (67.6)     | 85 (69.7)      | 80 (65.6)      | 596 (73.1)     | 288 (72.4)     | 308 (73.9)     |
| Neoadjuvant HER2-targeted therapy, <i>n</i> (%) |                 |                |                |                |                |                |                |                |                |
| Trastuzumab alone                               | 1196 (80.5)     | 596 (80.2)     | 600 (80.8)     | 190 (77.9)     | 97 (79.5)      | 93 (76.2)      | 659 (80.9)     | 319 (80.2)     | 340 (81.5)     |
| Trastuzumab plus pertuzumab                     | 272 (18.3)      | 139 (18.7)     | 133 (17.9)     | 51 (20.9)      | 25 (20.5)      | 26 (21.3)      | 149 (18.3)     | 75 (18.8)      | 74 (17.8)      |
| Trastuzumab plus other HER2-targeted therapy    | 18 (1.2)        | 8 (1.1)        | 10 (1.3)       | 3 (1.2)        | 0              | 3 (0.2)        | 7 (0.9)        | 4 (1.0)        | 3 (0.7)        |
| Nodal status, <i>n</i> (%)                      |                 |                |                |                |                |                |                |                |                |
| Positive                                        | 689 (46.4)      | 346 (46.6)     | 343 (46.2)     | 111 (45.5)     | 52 (42.6)      | 59 (48.4)      | 385 (47.2)     | 194 (48.7)     | 191 (45.8)     |
| Negative/not done                               | 797 (53.6)      | 397 (53.4)     | 400 (53.8)     | 133 (54.5)     | 70 (57.4)      | 63 (51.6)      | 430 (52.8)     | 204 (51.3)     | 226 (54.2)     |
| HER2 IHC status, <i>n</i> (%)                   |                 |                |                |                |                |                |                |                |                |
| IHC2+                                           | 326 (22.0)      | 168 (22.6)     | 158 (21.3)     | 44 (18.0)      | 18 (14.8)      | 26 (21.3)      | 198 (24.3)     | 97 (24.4)      | 101 (24.2)     |
| IHC3+                                           | 1132 (76.2)     | 559 (75.2)     | 573 (77.1)     | 198 (81.2)     | 102 (83.6)     | 96 (78.7)      | 599 (73.5)     | 293 (73.6)     | 306 (73.4)     |
| HER2 gene copy number, <i>n</i> (%)             | <i>n</i> = 1415 | <i>n</i> = 713 | <i>n</i> = 702 | <i>n</i> = 237 | <i>n</i> = 120 | <i>n</i> = 117 | <i>n</i> = 794 | <i>n</i> = 390 | <i>n</i> = 404 |
| 4 to <6                                         | 180 (12.7)      | 91 (12.8)      | 89 (12.7)      | 22 (9.3)       | 9 (7.5)        | 13 (11.1)      | 116 (14.6)     | 58 (14.9)      | 58 (14.4)      |
| ≥6                                              | 1211 (85.6)     | 607 (85.1)     | 604 (86.0)     | 213 (89.9)     | 109 (90.8)     | 104 (88.9)     | 662 (83.4)     | 322 (82.6)     | 340 (84.2)     |
| HER2 gene ratio, <i>n</i> (%)                   | <i>n</i> = 1415 | <i>n</i> = 713 | <i>n</i> = 702 | <i>n</i> = 237 | <i>n</i> = 120 | <i>n</i> = 117 | <i>n</i> = 794 | <i>n</i> = 390 | <i>n</i> = 404 |
| 2 to <4                                         | 405 (28.6)      | 203 (28.5)     | 202 (28.8)     | 64 (27.0)      | 26 (21.7)      | 38 (32.5)      | 247 (31.1)     | 123 (31.5)     | 124 (30.7)     |
| ≥4                                              | 988 (69.8)      | 498 (69.9)     | 490 (69.8)     | 171 (72.2)     | 92 (76.7)      | 79 (67.5)      | 534 (67.3)     | 260 (66.7)     | 274 (67.8)     |

Abbreviations: ER, estrogen receptor; HER2, human epidermal growth factor receptor 2; IDFS, invasive disease-free survival; IHC, immunohistochemistry; ITT, intent-to-treat; NAT, neoadjuvant therapy; PgR, progesterone receptor.

<sup>a</sup>Includes North, Central, and South American Indians.
