# Supplementary material for: Biomarker Data from the Phase III KATHERINE Study of Adjuvant T-DM1 versus Trastuzumab for Residual Invasive Disease after Neoadjuvant Therapy for HER2-Positive Breast Cancer
Source: PubMed Central journal article supplement — Clin Cancer Res. 2023 Feb 2;29(8):1569–81. doi: 10.1158/1078-0432.CCR-22-1989 (PMC10102844; doi:10.1158/1078-0432.ccr-22-1989), 2023-02-02
Supplement: ccr-22-1989_supplementary_table_s2_suppts2.pdf [file ccr-22-1989_supplementary_table_s2_suppts2.pdf]

**Supplementary Table S2.** Prognostic value for IDFS by treatment arm of biomarker gene expression levels (>median vs. ≤median and continuous) in post-NAT surgical RNA-evaluable tissue samples. Analysis is adjusted for tumor content. One sample could not be included because there was insufficient information on tumor content.

| Treatment arm | Gene/signature                 | Total n <sup>a</sup> | Subgroup n (>median vs. ≤median) | Total events | Subgroup events (>median vs. ≤median) | Hazard ratio          | 95% Confidence interval | Hazard ratio | 95% Confidence interval |
|---------------|--------------------------------|----------------------|----------------------------------|--------------|---------------------------------------|-----------------------|-------------------------|--------------|-------------------------|
|               |                                |                      |                                  |              |                                       | (>median vs. ≤median) |                         | (continuous) |                         |
| Trastuzumab   | ERBB2                          | 397                  | 200 vs. 197                      | 102          | 70 vs. 32                             | 2.02                  | 1.32–3.11               | 1.34         | 1.09-1.65               |
| T-DM1         |                                | 417                  | 207 vs. 210                      | 47           | 26 vs. 21                             | 1.01                  | 0.56–1.83               | 1.17         | 0.86-1.61               |
| Trastuzumab   | CD274                          | 397                  | 202 vs. 195                      | 102          | 39 vs. 63                             | 0.66                  | 0.44–1.00               | 0.90         | 0.71-1.15               |
| T-DM1         |                                | 417                  | 204 vs. 213                      | 47           | 22 vs. 25                             | 1.05                  | 0.59–1.87               | 0.93         | 0.63-1.38               |
| Trastuzumab   | CD8A                           | 397                  | 188 vs. 209                      | 102          | 41 vs. 61                             | 0.86                  | 0.57–1.29               | 0.91         | 0.71-1.17               |
| T-DM1         |                                | 417                  | 218 vs. 199                      | 47           | 25 vs. 22                             | 1.34                  | 0.74–2.43               | 1.22         | 0.82-1.81               |
| Trastuzumab   | Teff signature                 | 397                  | 190 vs. 207                      | 102          | 45 vs. 57                             | 0.99                  | 0.67–1.48               | 0.98         | 0.80-1.20               |
| T-DM1         |                                | 417                  | 216 vs. 201                      | 47           | 26 vs. 21                             | 1.29                  | 0.72–2.31               | 1.12         | 0.81-1.55               |
| Trastuzumab   | Three-gene signature           | 397                  | 193 vs. 204                      | 102          | 47 vs. 55                             | 0.96                  | 0.65–1.42               | 1.01         | 0.83-1.24               |
| T-DM1         |                                | 417                  | 213 vs. 204                      | 47           | 28 vs. 19                             | 1.40                  | 0.78–2.51               | 10.5         | 0.78-1.42               |
| Trastuzumab   | Five-gene signature            | 397                  | 197 vs. 200                      | 102          | 48 vs. 54                             | 1.01                  | 0.68–1.50               | 1.00         | 0.82-1.22               |
| T-DM1         |                                | 417                  | 209 vs. 208                      | 47           | 30 vs. 17                             | 1.89                  | 1.04–3.42               | 1.11         | 0.81-1.51               |
| Trastuzumab   | Th1 cytokine signature         | 397                  | 201 vs. 196                      | 102          | 53 vs. 49                             | 0.94                  | 0.64–1.40               | 0.98         | 0.81-1.19               |
| T-DM1         |                                | 417                  | 206 vs. 211                      | 47           | 31 vs. 16                             | 1.81                  | 0.98–3.35               | 1.34         | 0.96-1.86               |
| Trastuzumab   | Checkpoint inhibitor signature | 397                  | 204 vs. 193                      | 102          | 40 vs. 62                             | 0.69                  | 0.46–1.04               | 0.98         | 0.80-1.22               |
| T-DM1         |                                | 417                  | 202 vs. 215                      | 47           | 25 vs. 22                             | 1.31                  | 0.74–2.34               | 1.10         | 0.77-1.57               |
| Trastuzumab   | B cell signature               | 397                  | 200 vs. 197                      | 102          | 48 vs. 54                             | 1.21                  | 0.80–1.83               | 0.98         | 0.79-1.21               |
| T-DM1         |                                | 417                  | 206 vs. 211                      | 47           | 22 vs. 25                             | 1.07                  | 0.60–1.92               | 0.93         | 0.68-1.28               |

Abbreviations: IDFS, invasive disease-free survival; IFN $\gamma$ , interferon gamma; T-DM1, trastuzumab emtansine; checkpoint inhibitor signature (PD-L1/PD-L2/IDO); five-gene signature (PD-L1/granzymeB/CD8/IFN $\gamma$ /CXCL9); Teff, T-effector signature (CD8/granzymeA/granzymeB/perforin/IFN $\gamma$ ); Th1 cytokine signature (CXCL9/CXCL10/CXCL11); three-gene signature (PD-L1/IFN $\gamma$ /CXCL9); B cell signature (CD19/CD79A/FCRL5/MS4A1/POU2AF1/STAP1).

<sup>a</sup>Tumor content not available for one patient with a surgical sample available.
